# Supplementary material
Source: PubMed Central journal article supplement (PMC7996397)
Supplement: NIHMS1618426-supplement-1.pdf [file NIHMS1618426-supplement-1.pdf]

**Supplemental Table 1.** Post outcomes by influencer.

|        | <b>Brand hashtag recognition (N/% correct)</b> | <b>Second hashtag recognition (N/% correct)</b> | <b>Post engagement intentions (M/SD)</b> | <b>Influencer credibility (M/SD)</b> | <b>Ad recognition (M/SD)</b> | <b>Ad trust (M/SD)</b> |
|--------|------------------------------------------------|-------------------------------------------------|------------------------------------------|--------------------------------------|------------------------------|------------------------|
| Aris   | 324 (80.4%)                                    | 239 (59.3%)                                     | 2.51 (1.15)                              | 3.34 (.95)                           | 3.67 (1.18)                  | 2.82 (.97)             |
| Aimee  | 264 (80.7%)                                    | 184 (56.3%)                                     | 2.64 (1.15)                              | 3.41 (.93)                           | 3.76 (1.11)                  | 2.94 (1.01)            |
| Azure  | 295 (89.9%)                                    | 123 (54.2%)                                     | 2.61 (1.17)                              | 3.42 (.92)                           | 3.75 (1.11)                  | 2.82 (1.04)            |
| Blues  | 259 (80.4%)                                    | 184 (57.1%)                                     | 2.47 (1.15)                              | 3.30 (.94)                           | 3.63 (1.23)                  | 2.82 (.98)             |
| Leo    | 261 (82.1%)                                    | 188 (59.1%)                                     | 2.60 (1.18)                              | 3.42 (.93)                           | 3.48 (1.23)                  | 2.86 (1.00)            |
| Luca   | 243 (77.4%)                                    | 180 (57.3%)                                     | 2.40 (1.12)                              | 3.24 (.94)                           | 3.53 (1.21)                  | 2.85 (.94)             |
| Mayne  | 275 (82.6%)                                    | 195 (58.6%)                                     | 2.52 (1.17)                              | 3.30 (.96)                           | 3.95 (1.05)                  | 2.86 (.99)             |
| Samira | 273 (81.5%)                                    | 177 (52.8%)                                     | 2.53 (1.17)                              | 3.42 (.93)                           | 3.86 (1.11)                  | 2.97 (.96)             |
| Sarah  | 272 (84.5%)                                    | 203 (63.0%)                                     | 2.66 (1.15)                              | 3.44 (.90)                           | 3.58 (1.24)                  | 2.85 (1.01)            |
| Seeing | 270 (84.6%)                                    | 171 (53.6%)                                     | 2.53 (1.20)                              | 3.33 (.95)                           | 3.76 (1.15)                  | 2.89 (.99)             |
| Sergio | 274 (84.0%)                                    | 176 (54.0%)                                     | 2.49 (1.16)                              | 3.25 (.96)                           | 3.53 (1.18)                  | 2.78 (.97)             |

Note: Due to a programming error, the correct disclosure hashtag was not provided as a response option for participants who saw the Azure ambiguous disclosure post. N/% correct is reported only for the Azure no disclosure post.
